# Supplementary material for: Synthese et reactivite d'alcools allyliques a structure 1,4-benzodioxinique : applications en synthese organique
Source: Royal Society of Chemistry journal article supplement (doi:10.1039/b407108e), 1993-01-01

## SUPPLEMENTARY INFORMATION

**A circular tris[2]catenane from molecular ‘figure-of-eight’**

Akiko Hori, Ken-ichi Yamashita, Takahiro Kusakawa, Akihiko Akasaka, Kumar Biradha and Makoto Fujita\*

\*To whom the correspondence should be addressed (e-mail: mfujita@appchem.t.u-tokyo.ac.jp).

---

|                                                                                          |       |        |
|------------------------------------------------------------------------------------------|-------|--------|
| Synthesis and physical properties of <b>1</b>                                            | ••••• | p. 1   |
| CSI-MS of <b>1</b>                                                                       | ••••• | p. 2   |
| CSI-MS of the mixture <b>1</b> , ( <b>1</b> ) <sub>2</sub> and ( <b>1</b> ) <sub>3</sub> | ••••• | p. 3-4 |

---

**Complex 1:** To a solution of the ligand (14.2 mg, 0.02 mmol) in DMSO (1 mL), Pd(NO<sub>3</sub>)<sub>2</sub> (2.3 mg, 0.01 mmol) was added and the mixture was stirred for 15 min at 60 °C to give a pale yellow solution. Complex **1** was isolated as a white powder by adding a large amount of diethyl ether and it was crystallized from a DMF-MeOH-diethyl ether solution as colorless crystals. Yield 95%. mp 200 °C dec. <sup>1</sup>H NMR (500 MHz, DMSO-*d*<sub>6</sub>, TMS) δ 9.64 (d, *J* = 5.8 Hz, 8H, PyH<sub>α</sub>), 8.53 (s, 4H, ArH<sub>d</sub>), 8.38 (d, *J* = 7.8 Hz, 4H, ArH<sub>e</sub>), 8.32 (s, 2H, ArH<sub>a</sub>), 8.30 (d, *J* = 7.8 Hz, 4H, ArH<sub>c</sub>), 8.22-8.17 (m, 14H, PyH<sub>β</sub> and ArH<sub>f and b</sub>), 8.05 (d, *J* = 8.2 Hz, 2H, ArH<sub>g</sub>), 4.74 (s, 4H, -CH<sub>2</sub>-). <sup>13</sup>C NMR (125 MHz, DMSO-*d*<sub>6</sub>, CHCl<sub>3</sub>) δ 152.5 (Cq), 152.2 (CH<sub>α</sub>), 145.5 (d, *J* = 247 Hz, CF<sub>i</sub>), 144.4 (d, *J* = 247 Hz, CF<sub>j</sub>), 141.6 (Cq), 141.0 (Cq), 131.0 (CH<sub>i</sub>), 130.5 (CH<sub>g</sub>), 130.4 (CH<sub>b</sub>), 129.3 (CH<sub>d</sub>), 129.1 (CH<sub>c</sub>), 128.3 (Cq), 128.2 (CH<sub>β</sub>), 127.6 (CH<sub>e</sub>), 125.9 (CH<sub>a</sub>), 120.3 (t, *J* = 17.0 Hz, CF<sub>h</sub>), 116.7 (t, *J* = 18.6 Hz, CF<sub>k</sub>), 28.2 (-CH<sub>2</sub>-). <sup>19</sup>F NMR (300 MHz, DMSO-*d*<sub>6</sub>, CF<sub>3</sub>COOH) δ -64.56 (m, 4F, ArF), -64.98 (m, 4F, ArF). IR (KBr, cm<sup>-1</sup>) 1475, 1280, 1330, 1176, 994, 788. CSI-MS *m/z* 761 [1-(NO<sub>3</sub>)<sub>2</sub>]<sup>2+</sup>, 798 [1-(NO<sub>3</sub>)<sub>2</sub>+dmf]<sup>2+</sup>, 1559 [1-(NO<sub>3</sub>)<sub>2</sub>+Cl]<sup>+</sup>. Elemental Analysis: Calcd for C<sub>84</sub>H<sub>48</sub>N<sub>6</sub>F<sub>16</sub>PdO<sub>6</sub>·DMF·H<sub>2</sub>O: C, 60.10; H, 3.30; N, 5.64%; Found: C, 60.38; H, 3.21; N, 5.69%. **1**·4Et<sub>2</sub>O was obtained as colorless crystals suitable for X-ray crystallographic studies.

**Catenation:** Complex **1** was transformed into catenated dimer (**1**)<sub>2</sub> and trimer (**1**)<sub>3</sub> in a polar media. Water was added into a DMSO solution of **1** at low concentration (0.5 mM). The reaction mixture was stirred for 30 min at 60 °C. In a control experiment using D<sub>2</sub>O-DMSO-*d*<sub>6</sub>, the formation of catenated compounds was monitored by <sup>1</sup>H NMR.

CSI-MS of **1** (DMF-MeCN 1:3 solution)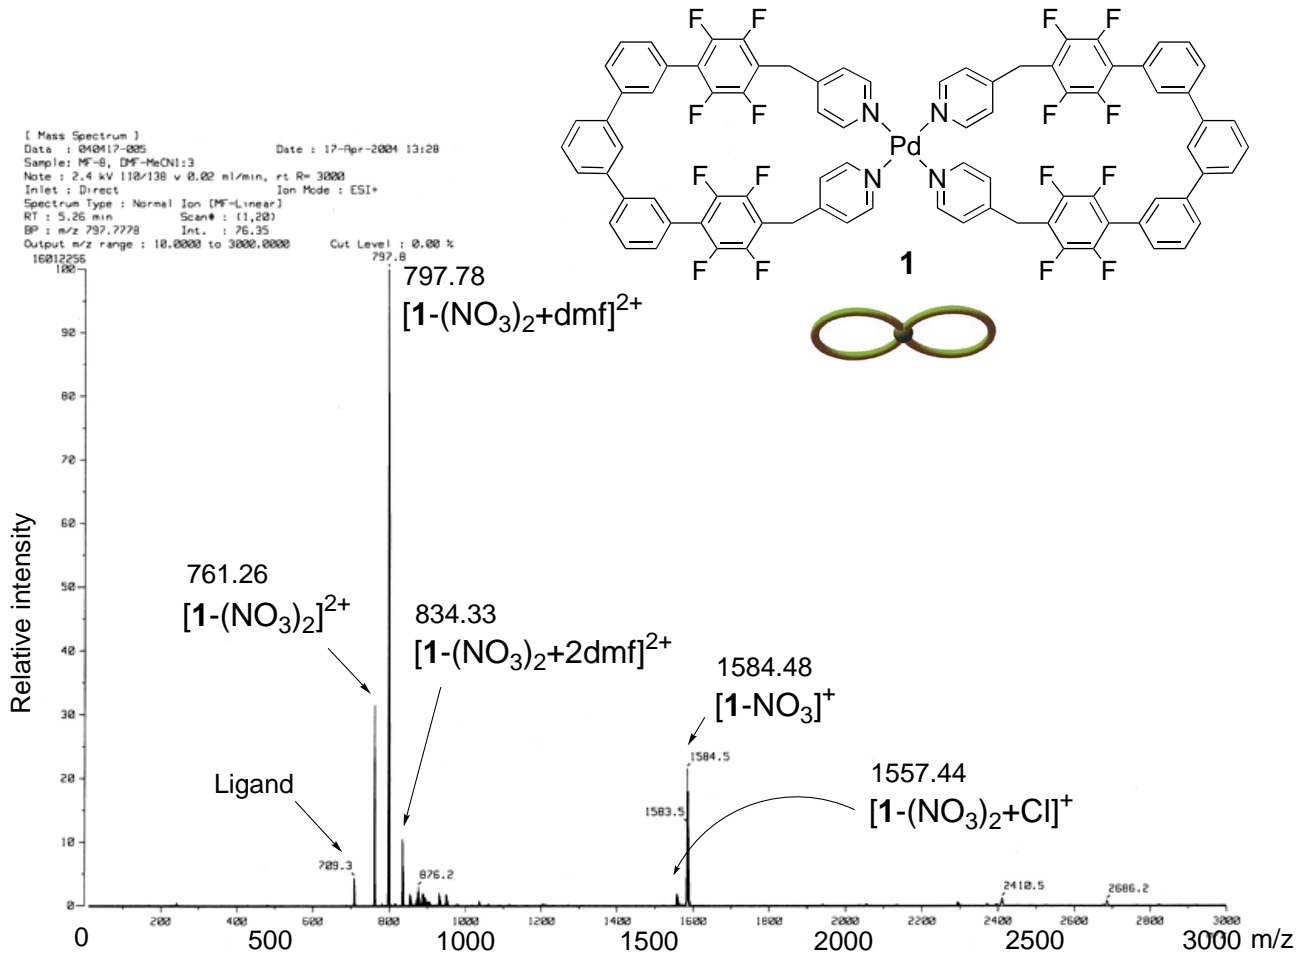

(High Resolution R=3000)

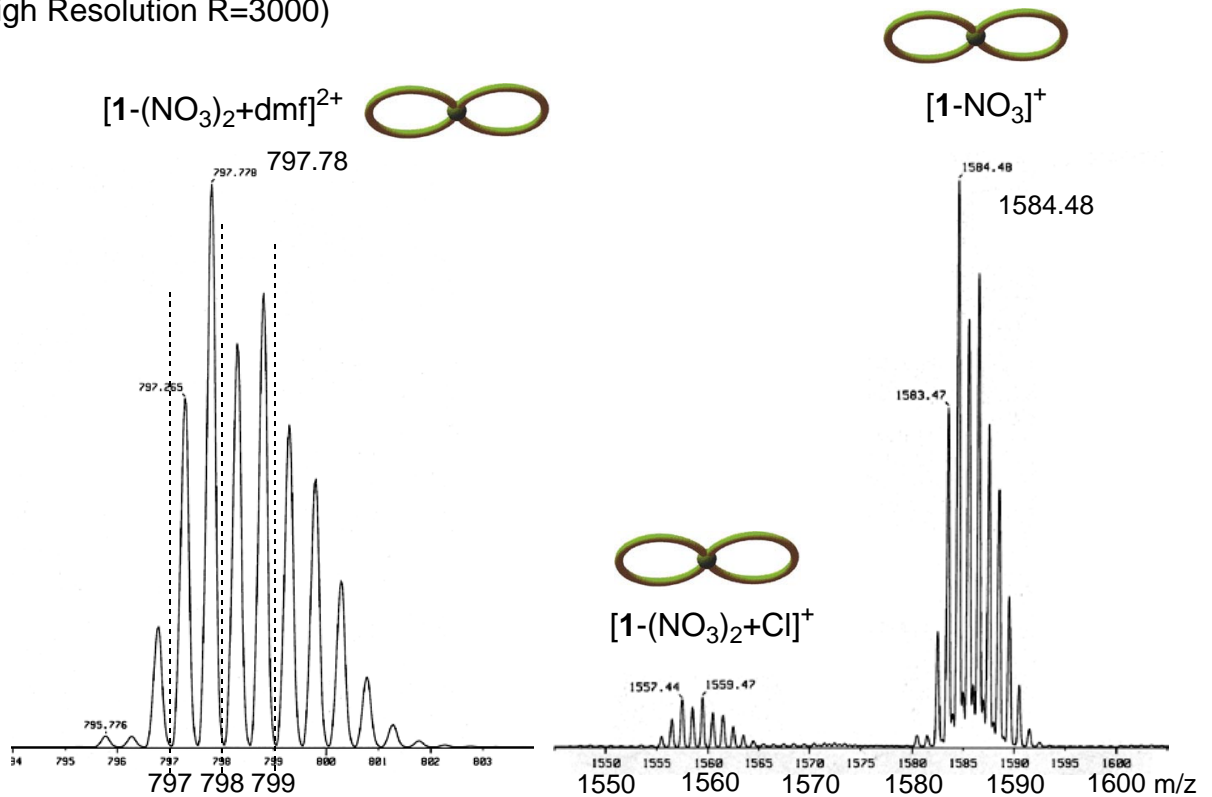

CSI-MS of the mixture (1)<sub>1-3</sub> (DMF-H<sub>2</sub>O 1:1.2 solution)

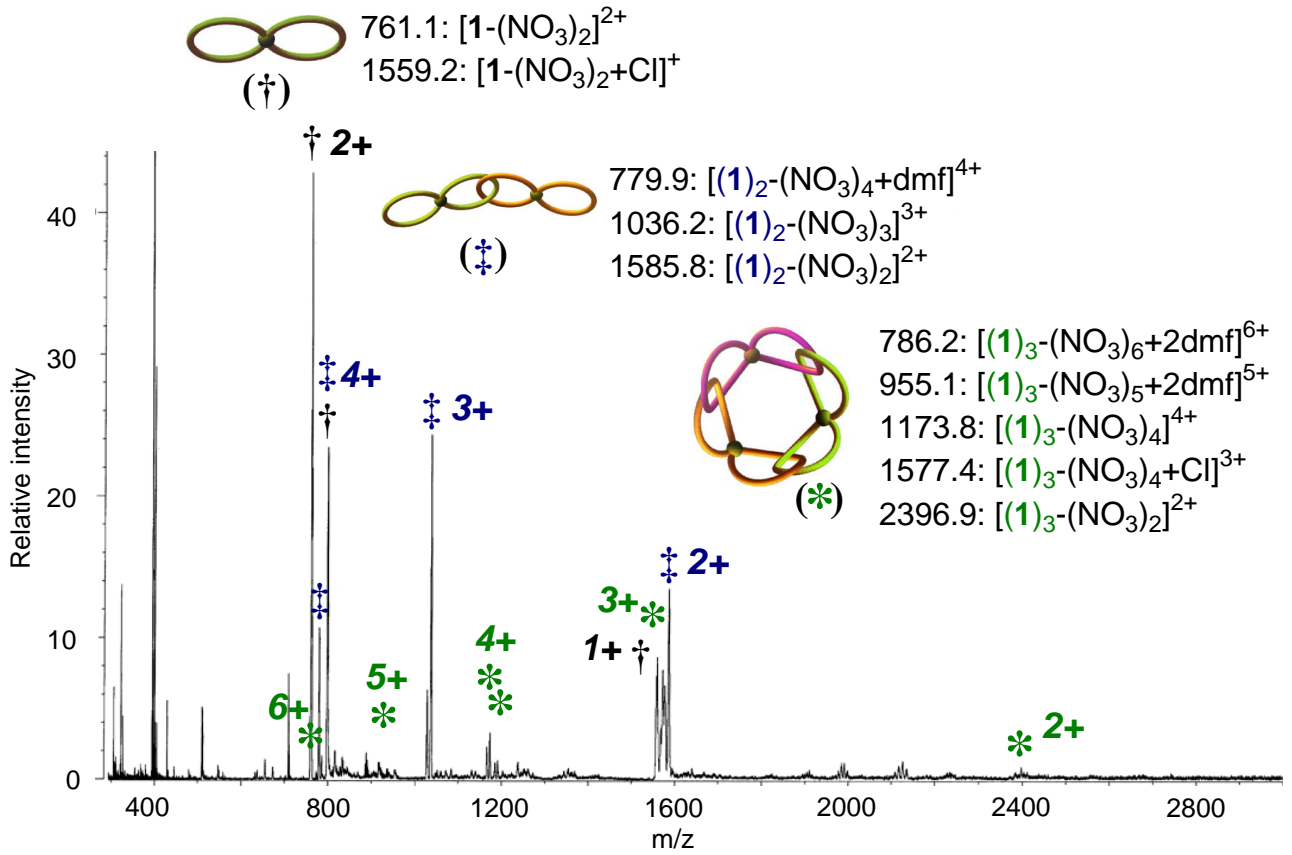

(High Resolution R=3000)

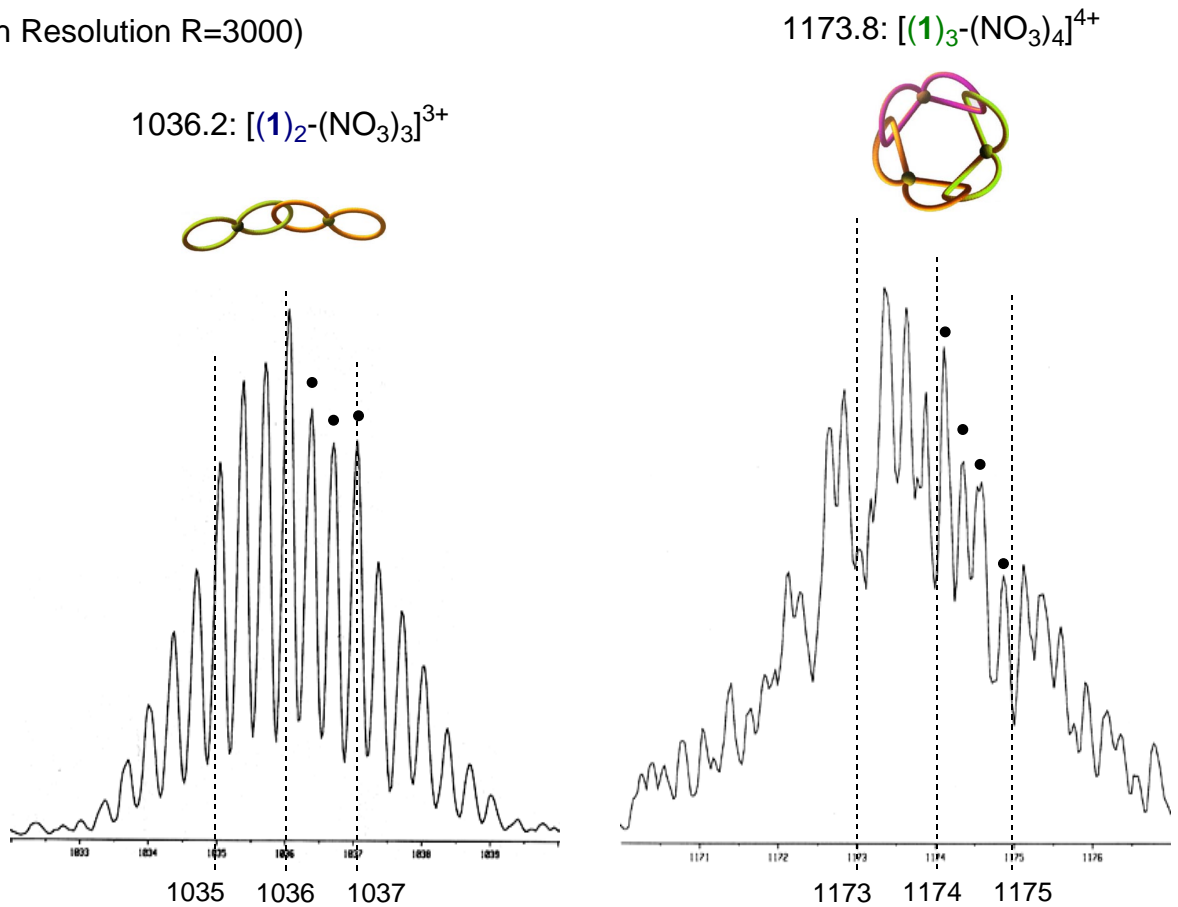

CSI-MS of the mixture (1)<sub>1-3</sub> (DMF-H<sub>2</sub>O 1:1.2 solution)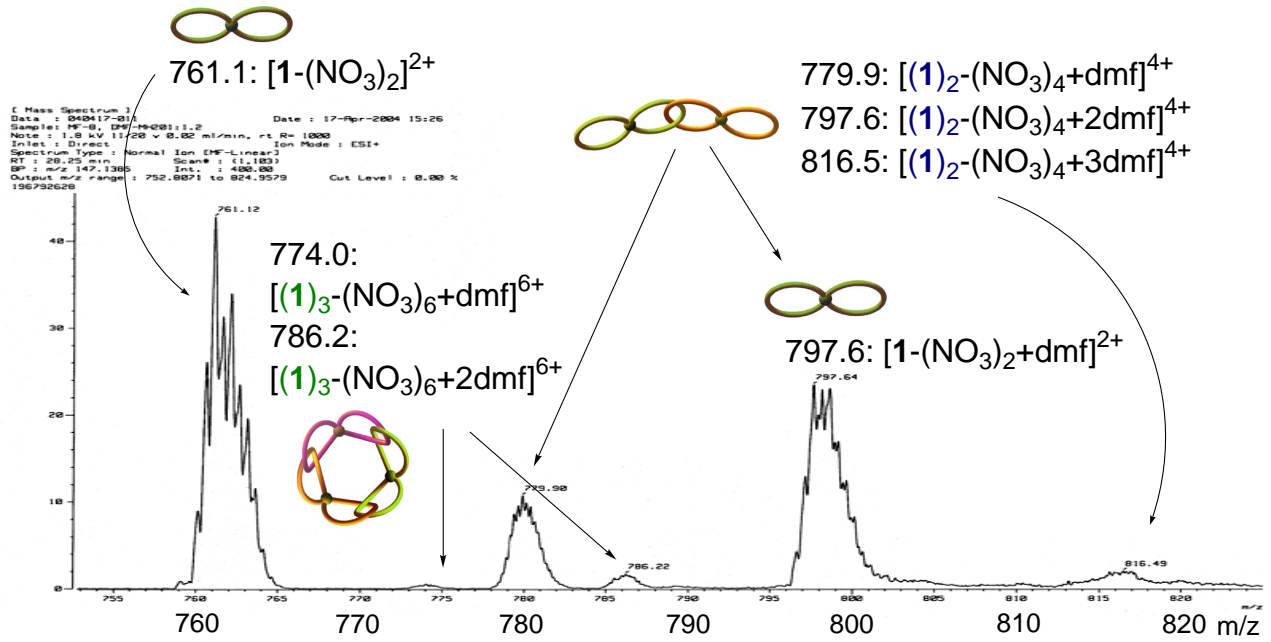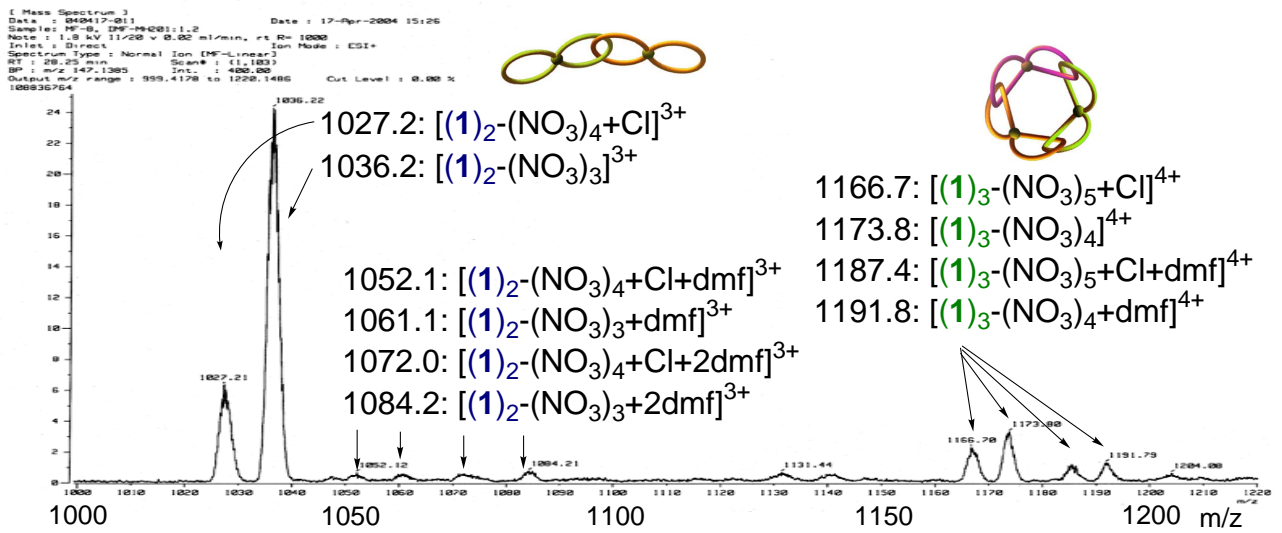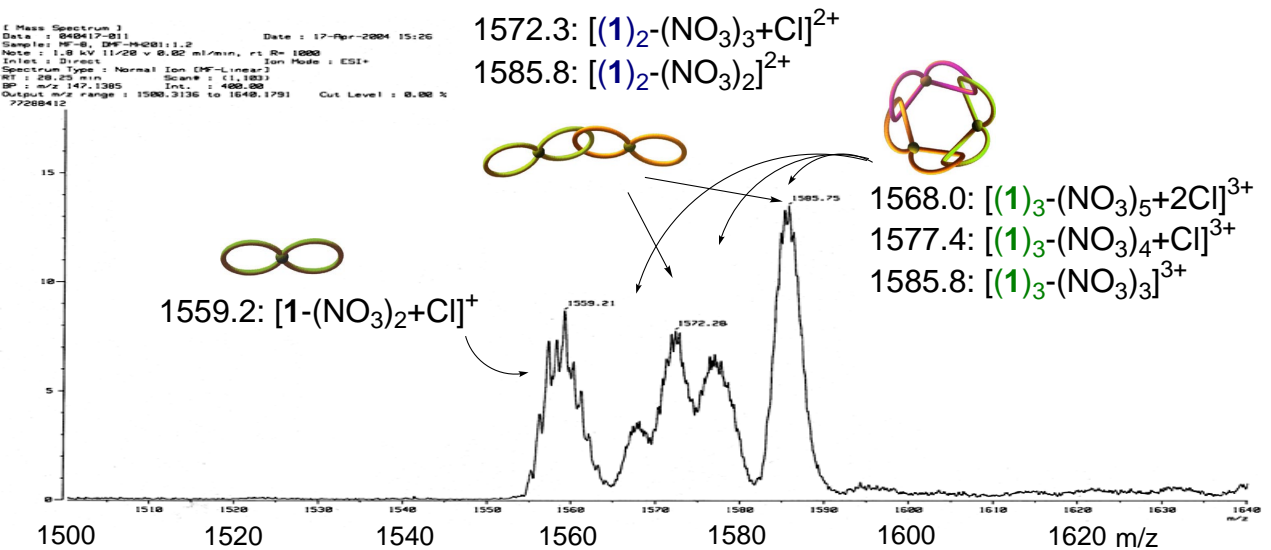

Supplement: b407108e.pdf [file b407108e.pdf]
